# Supplementary material for: Practical N-Hydroxyphthalimide-Mediated Oxidation of Sulfonamides to N-Sulfonylimines
Source: MDPI journal article supplement (doi:10.3390/molecules24203771), 2019-10-19

# Practical *N*-Hydroxyphthalimide-Mediated Oxidation of Sulfonamides to *N*-Sulfonylimines

Jian Wang <sup>a,\*</sup>, Wen-Jing Yi <sup>b</sup>

<sup>a</sup> *Sichuan Industrial Institute of Antibiotics, Chengdu University, Chengdu, 610052, P. R. China*

<sup>b</sup> *College of Chemistry and Environmental Protection Engineering, Southwest Minzu University, Chengdu, 610041, P. R. China*

### General information:

$^1\text{H}$ -NMR spectra were measured on a JEOL-600M with  $\text{CD}_3\text{CN}$  as solvent and recorded in ppm relative to internal tetramethylsilane standard.

### Copies of new compounds $^1\text{H}$ NMR and $^{13}\text{C}$ NMR

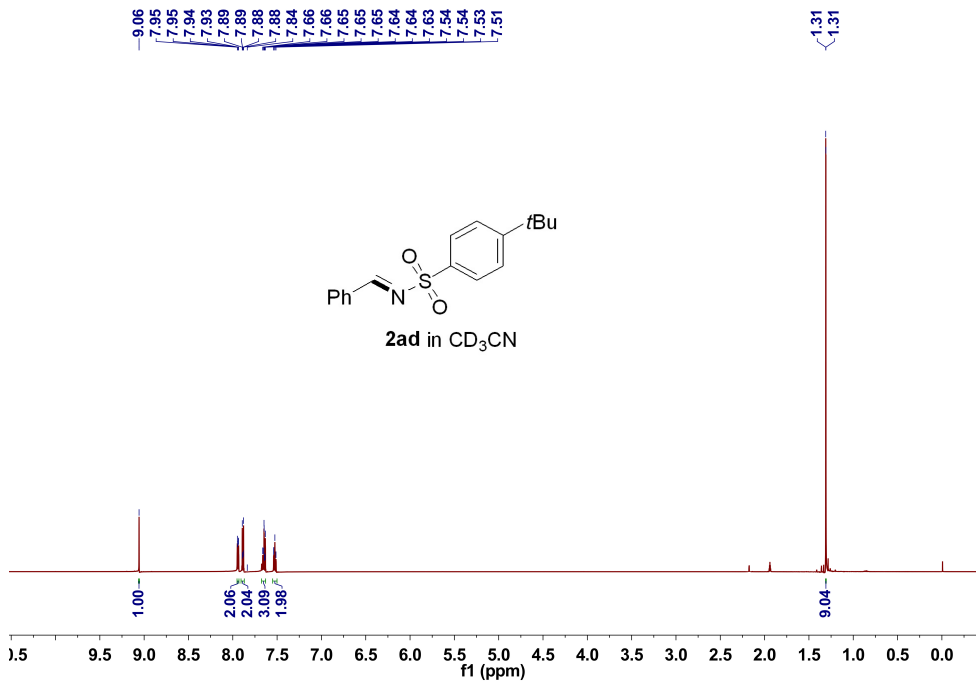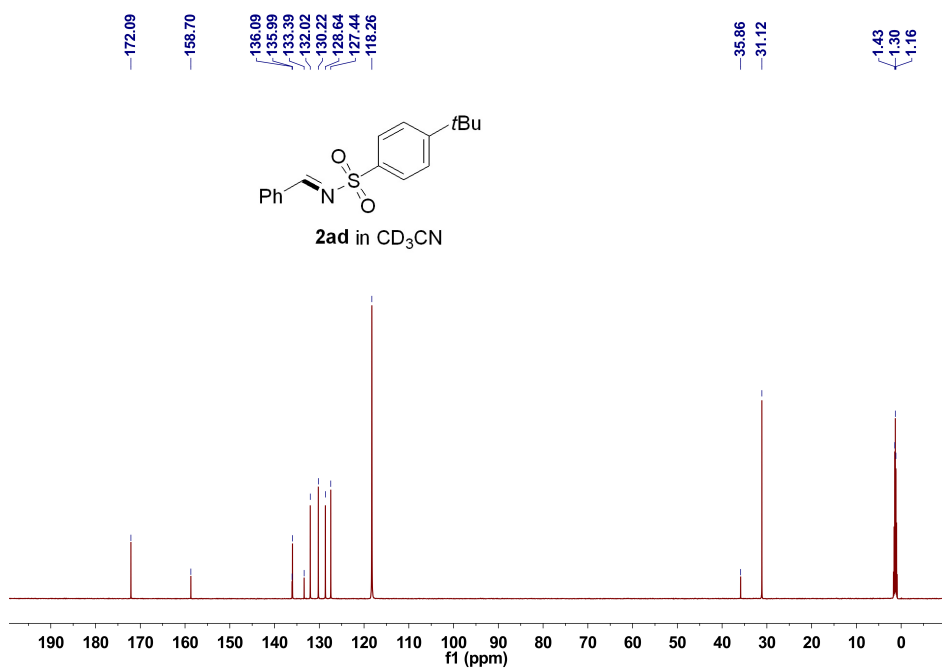

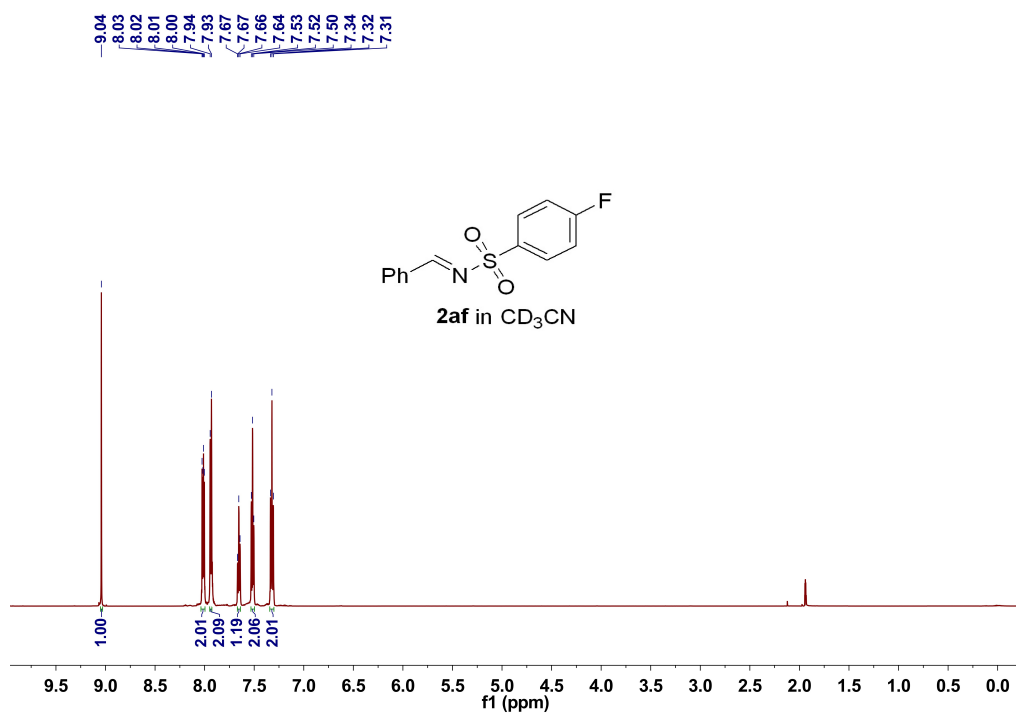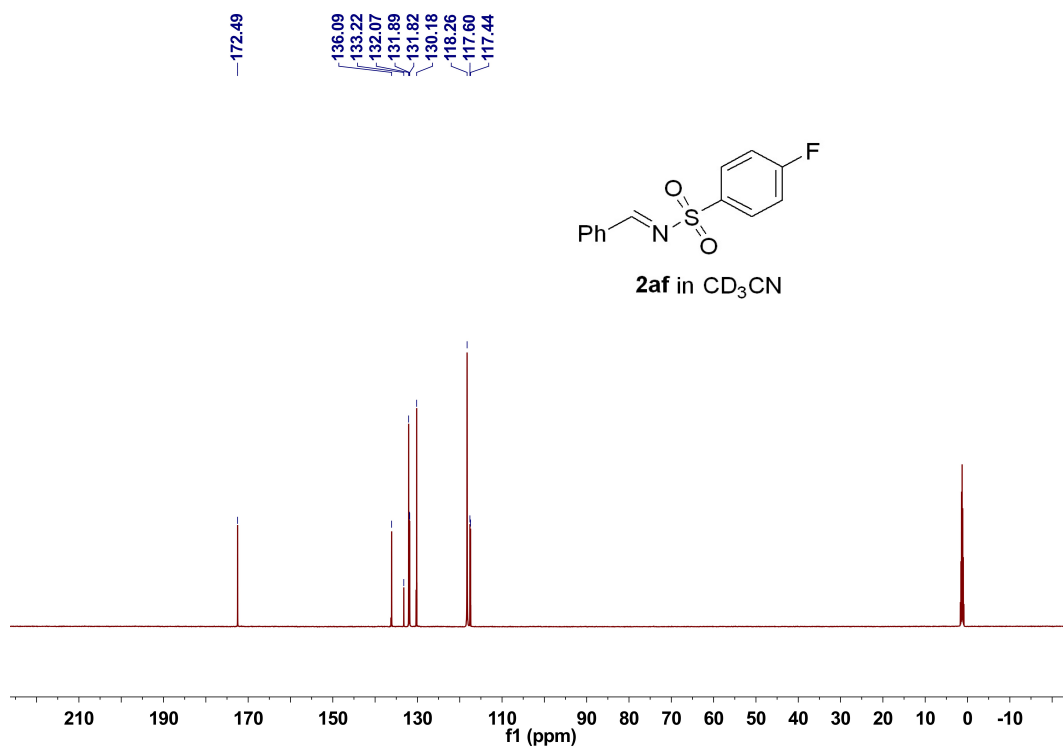

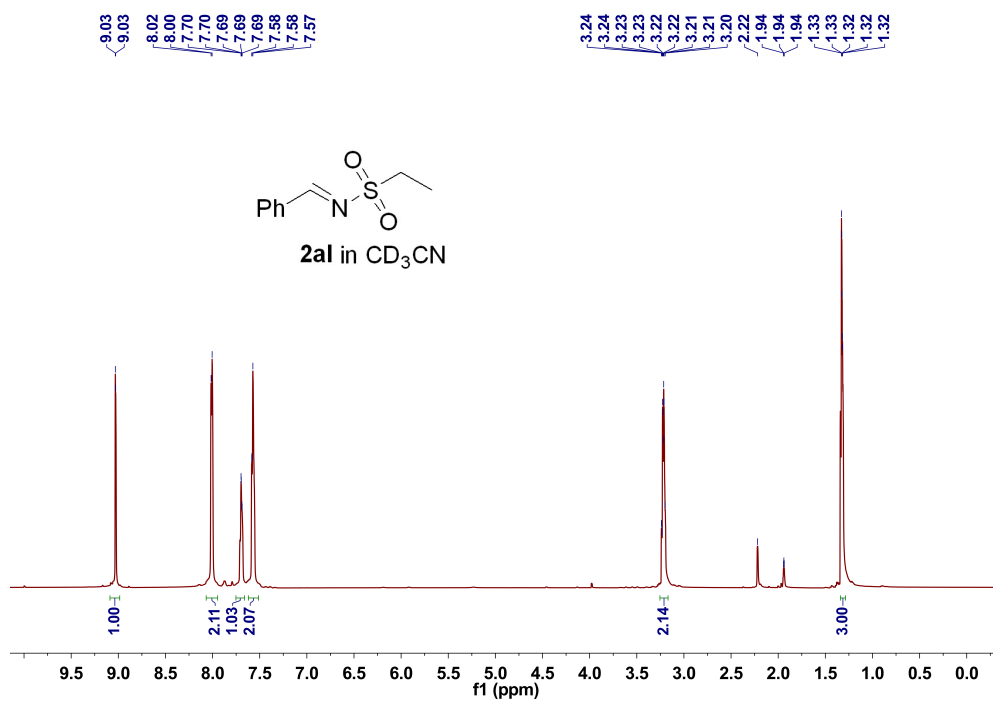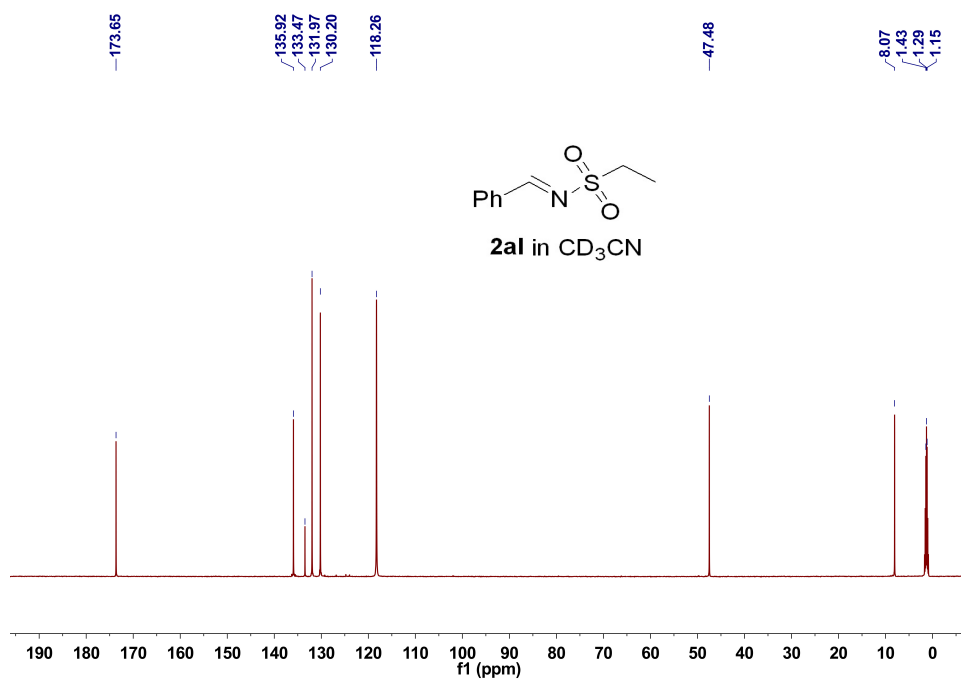



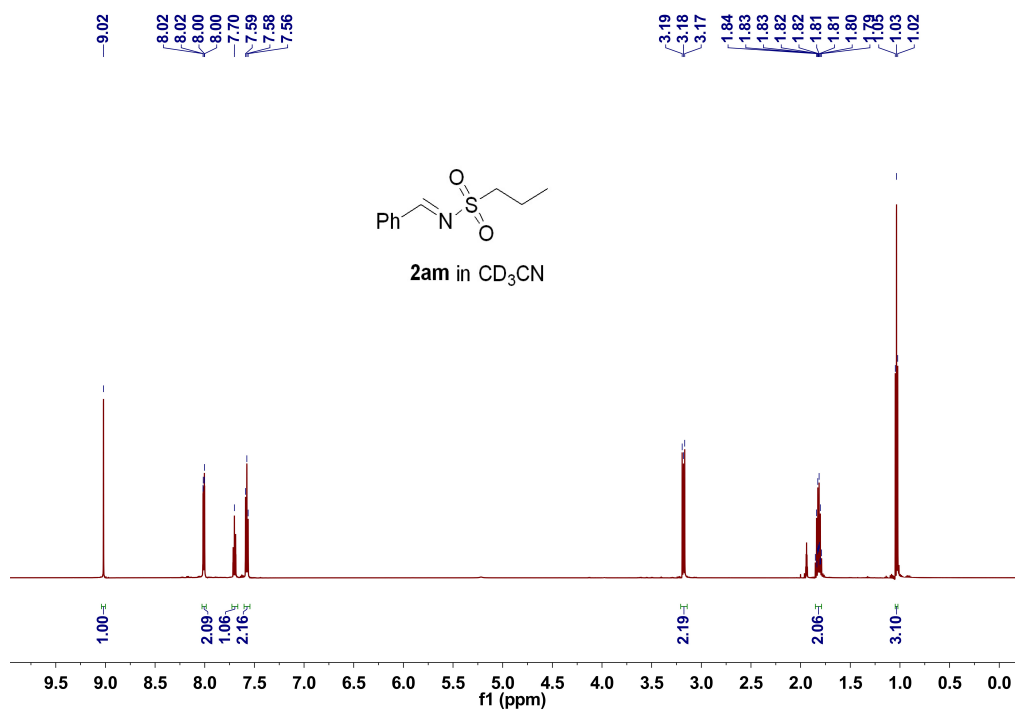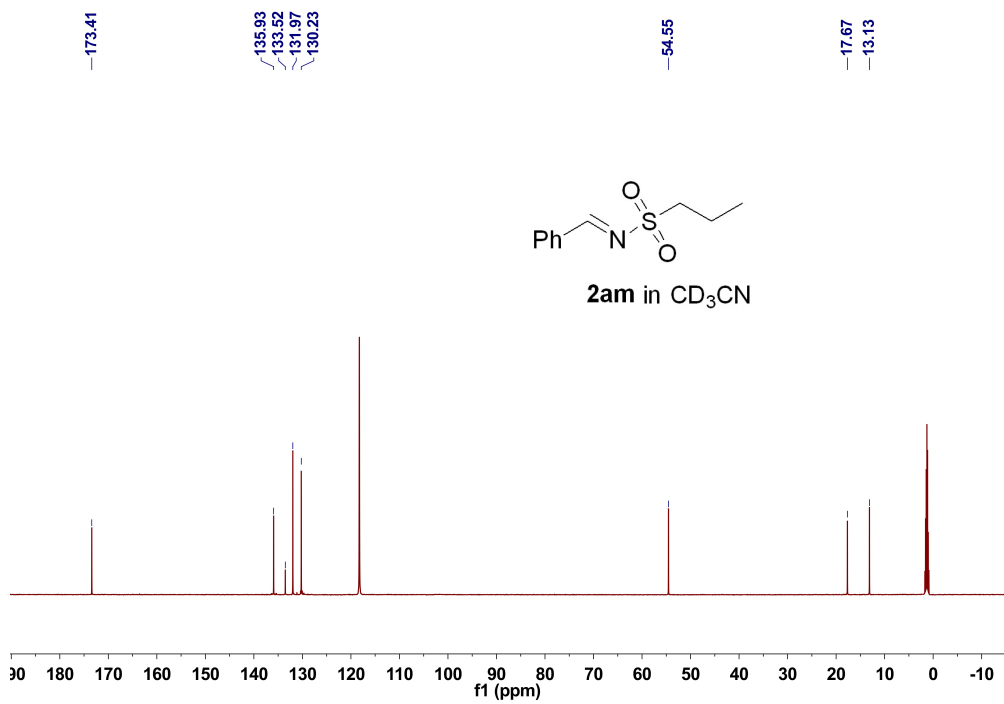

Supplement: s1 [file s1]
